# Supplementary material for: Unique insight into phase separation in polymer solar cells from their electric characteristics
Source: Royal Society of Chemistry journal article supplement (doi:10.1039/c5cp05471k), 2015-01-01
Supplement: c5cp05471k1.pdf [file c5cp05471k1.pdf]

## Supporting Information

### Unique insight on phase separation in polymer solar cells from its electric characteristics

Jian Wang<sup>a</sup>, Fujun Zhang<sup>a\*</sup>, Qiaoshi An<sup>a</sup>, Qianqian Sun<sup>a</sup>, Jian Zhang<sup>b</sup>, Bin Hu<sup>a,c\*</sup>

- a) Key Laboratory of Luminescence and Optical Information, Ministry of Education, Beijing Jiaotong University, Beijing 100044, China E-mail: [fjzhang@bjtu.edu.cn](mailto:fjzhang@bjtu.edu.cn)
- b) Department of Material Science and Technology, Guangxi Key Laboratory of Information Materials, Guilin University of Electronic Technology, Guilin 541004, Guangxi, China
- c) Department of Materials Science and Engineering, University of Tennessee, Knoxville, Tennessee 37996, United States E-mail: [bhu@utk.edu](mailto:bhu@utk.edu)

The **Fig. S1** shows absorption spectra of neat PBDT-TS1 film, PBDT-TS1:ICBA and PBDT-TS1:PC<sub>61</sub>BM blend films prepared with different solution processing ways, consisting of room temperature (20 °C, cool) solution, hot (70 °C) solution, cool solution with solvent additive 1,8-diodioctane (DIO) and hot solution with solvent additive DIO. All of the films were dried under the vacuum condition (~ 1 Pa) for 10 minutes. PBDT-TS1:ICBA and PBDT-TS1:PC<sub>61</sub>BM blend films show the similar absorption range, and the absorption spectra of the blend films prepared with different solution processing methods were almost kept constant.

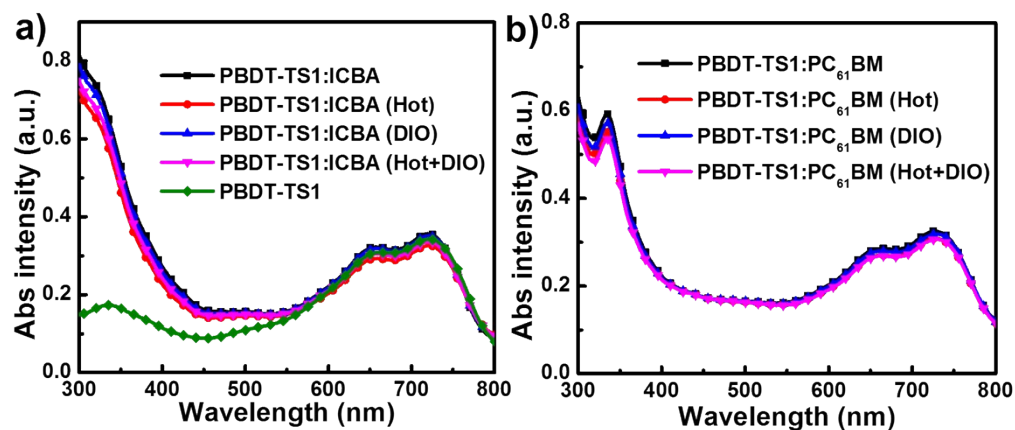

**Fig. S1** The absorption spectra of PBDT-TS1 film, PBDT-TS1:ICBA and PBDT-TS1:PC<sub>61</sub>BM blend films prepared with different solution processing methods.

\* Email: [fjzhang@bjtu.edu.cn](mailto:fjzhang@bjtu.edu.cn) (Fujun) Tel: 0086-10-51684908

More than one hundred PSCs were prepared to confirm the solution processing methods on PSCs performance. The detailed  $J-V$  curves of part cells based on PBDT-TS1:ICBA (1:1.5, wt/wt) are shown in **Fig. S2**. The PCE of the PSCs are increased to 4.32% from 3.25% by optimizing the D/A phase separation with hot (70 °C) solution with DIO solvent additive. The detailed  $J-V$  curves of part cells based on PBDT-TS1:PC<sub>61</sub>BM (1:1.5, wt/wt) are shown in **Fig. S3**. The PCE of the PSCs are increased to 5.56% from 5.97% by optimizing the D/A phase separation with cool solution with DIO solvent additive. The average PCE was calculated based on 20 cells prepared under the same condition.

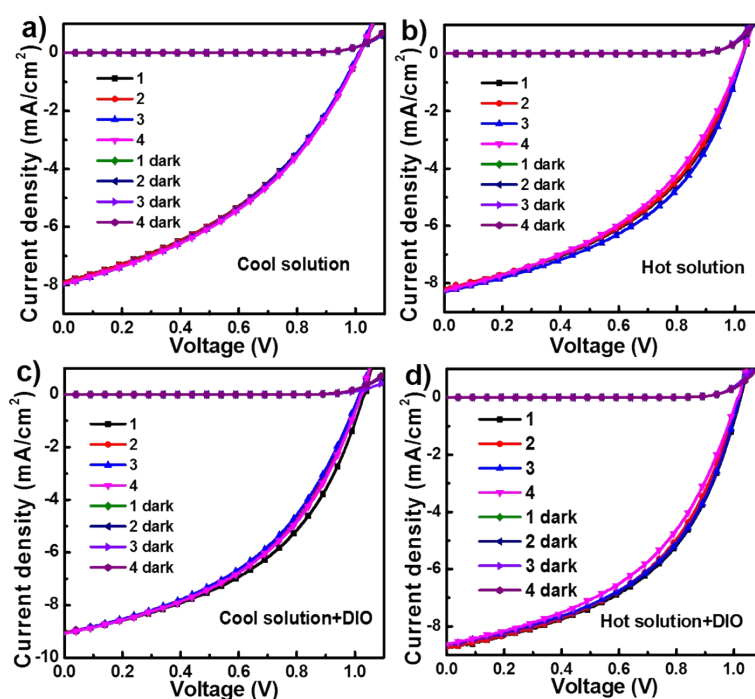

**Fig. S2** The  $J-V$  curves measured under AM 1.5 light (100 mW/cm<sup>2</sup>) and in dark condition of PSCs based on different PBDT-TS1:ICBA blend films.

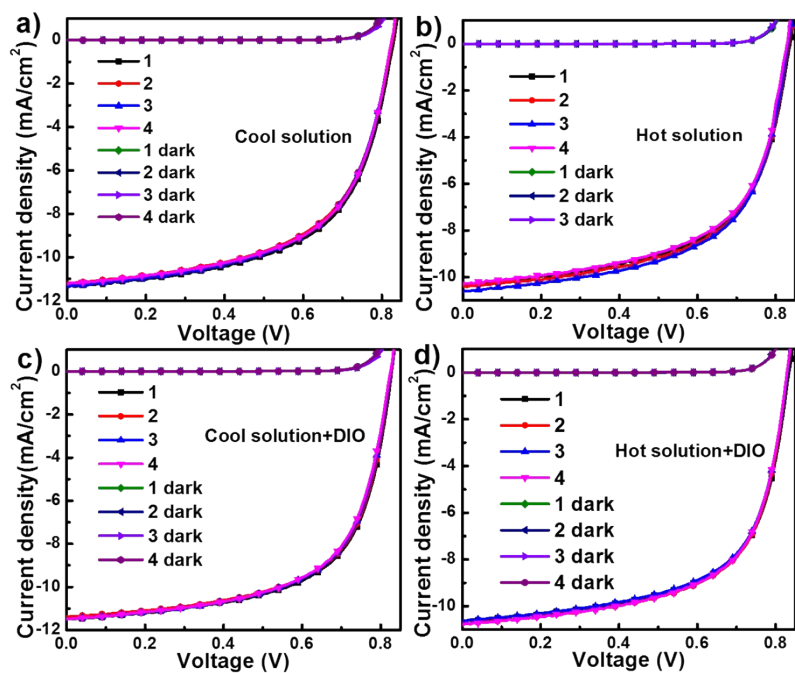

**Fig. S3** The  $J$ - $V$  curves measured under AM 1.5 light ( $100 \text{ mW/cm}^2$ ) and in dark condition of PSCs based on different PBBDT-TS1:PC<sub>61</sub>BM blend films.

The **Fig. S4** shows PL spectra of neat PBBDT-TS1 film, PBBDT-TS1:ICBA and PBBDT-TS1:PC<sub>61</sub>BM blend films prepared with different solution processing ways, consisting of cool (20 °C, room temperature) solution, hot (70 °C) solution, cool solution with solvent additive DIO and hot solution with solvent additive DIO. All of the films were dried under the vacuum condition ( $\sim 1 \text{ Pa}$ ) for 10 minutes. The PL spectra were measured under the excitation wavelength of 680 nm.

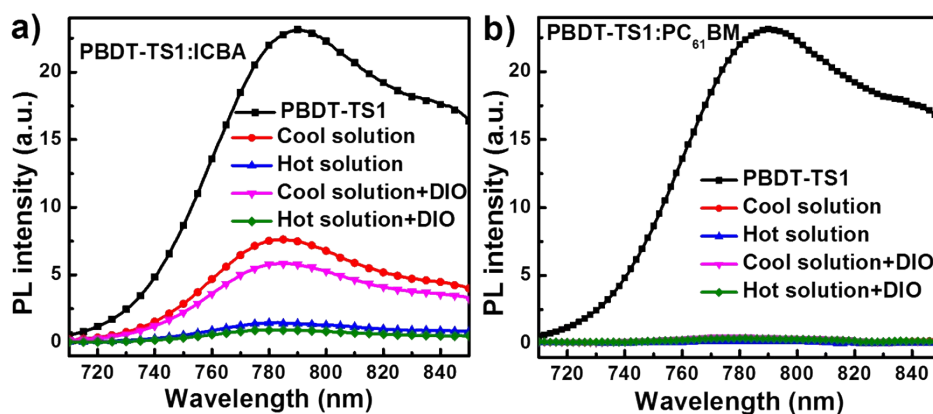

**Fig. S4** PL spectra of neat PBBDT-TS1, PBBDT-TS1:ICBA and PBBDT-TS1:PC<sub>61</sub>BM blend films prepared with different solution processing methods.

The **Fig. S5** shows phase images of PBDT-TS1:ICBA and PBDT-TS1:PC<sub>61</sub>BM blend films prepared with different solution processing ways, consisting of cool (20 °C, room temperature) solution, hot (70 °C) solution, cool solution with solvent additive DIO and hot solution with solvent additive DIO. All of the films were dried under the vacuum condition (~ 1 Pa) for 10 minutes.

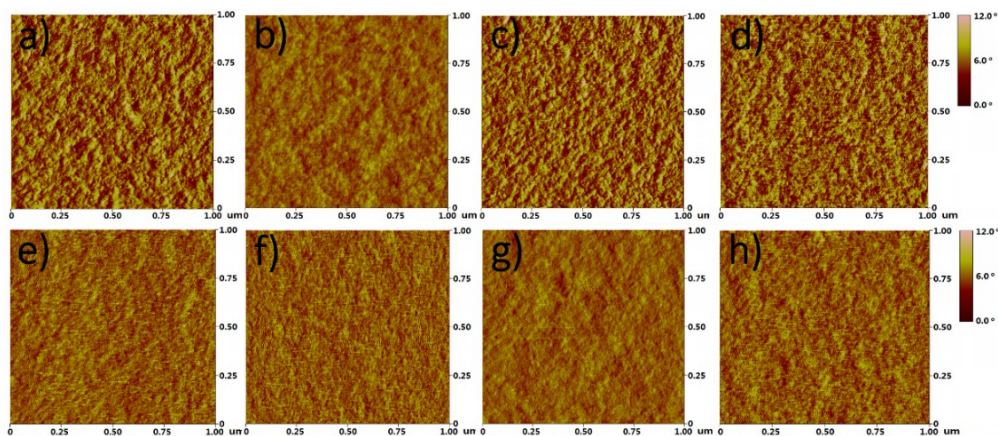

**Fig. S5** Phase images of PBDT-TS1:ICBA and PBDT-TS1:PC<sub>61</sub>BM blend films prepared with different solution processing methods.

The **Fig. S6** shows the schematic image of phase separation of active layer with different film drying process. The D/A phase separation strongly depends on the solution conditions, post treatment conditions on the active layer as well as the intrinsic factor of electron donor and acceptor molecular chemical structures.

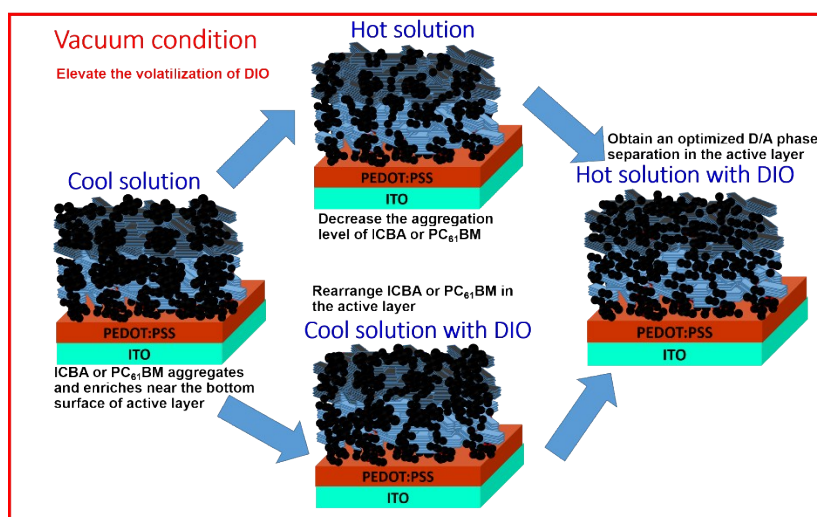

**Fig. S6** The schematic image of phase separation of active layer with different film drying process.
